# Supplementary material for: Non-nucleoside reverse transcriptase inhibitor-based combination antiretroviral therapy is associated with lower cell-associated HIV RNA and DNA levels compared to protease inhibitor-based therapy
Source: eLife journal article supplement (doi:10.7554/elife.68174), 2021-08-13
Supplement: supp [file elife-68174-supp-v1.zip]

Archive with 9 entries (9 files):
- elife_poa_e68174_Figure_1_figure_supplement_1.pdf
- elife_poa_e68174_Figure_1_figure_supplement_2.pdf
- elife_poa_e68174_Figure_2_figure_supplement_1.pdf
- elife_poa_e68174_Figure_2_figure_supplement_2.pdf
- elife_poa_e68174_Figure_3_figure_supplement_1.pdf
- elife_poa_e68174_Figure_3_figure_supplement_2.pdf
- elife_poa_e68174_Figure_3_figure_supplement_3.pdf
- elife_poa_e68174_Supplementary_file_1.docx
- elife_poa_e68174_Transparent_Reporting_File.docx
