# Supplementary material for: Non-nucleoside reverse transcriptase inhibitor-based combination antiretroviral therapy is associated with lower cell-associated HIV RNA and DNA levels compared to protease inhibitor-based therapy
Source: eLife journal article supplement (doi:10.7554/elife.68174), 2021-08-13
Supplement: supp [file elife-68174-supp-v1.zip › elife_poa_e68174_Figure_1_figure_supplement_1.pdf]

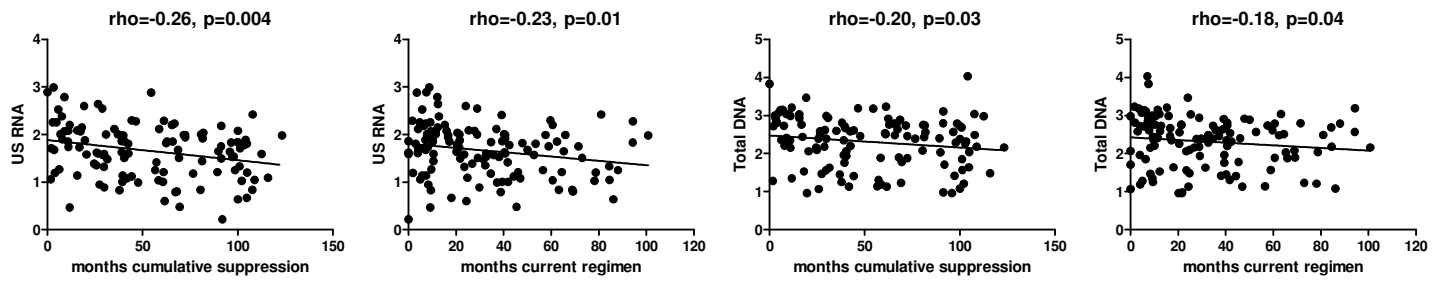

**Figure 1-figure supplement 1.** Effects of duration of cumulative virological suppression and duration of the current regimen on the levels of cell-associated HIV unspliced RNA (US RNA) and total HIV DNA in the AIMS cohort (n=124). Units of measurement are: US RNA:  $\log_{10}$  copies/ $\mu\text{g}$  total RNA, total DNA:  $\log_{10}$  copies/ $10^6$  PBMC. Levels of significance were calculated by Spearman correlation analyses.
