# Supplementary material for: Non-nucleoside reverse transcriptase inhibitor-based combination antiretroviral therapy is associated with lower cell-associated HIV RNA and DNA levels compared to protease inhibitor-based therapy
Source: eLife journal article supplement (doi:10.7554/elife.68174), 2021-08-13
Supplement: supp [file elife-68174-supp-v1.zip › elife_poa_e68174_Figure_1_figure_supplement_2.pdf]

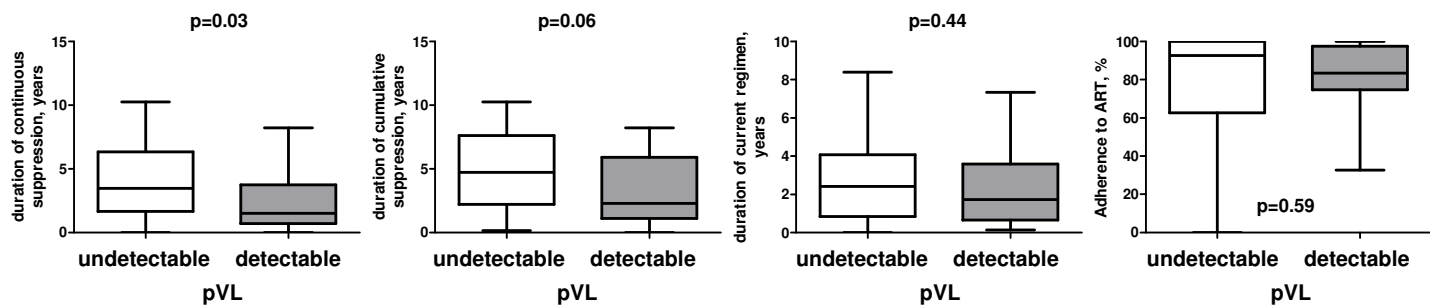

**Figure 1-figure supplement 2.** Differences in duration of continuous and cumulative virological suppression, duration of current regimen, and in adherence to ART between participants with undetectable vs. low-level detectable pVL in the AIMS cohort. Levels of significance were calculated by Mann-Whitney tests.
