# Supplementary material for: Non-nucleoside reverse transcriptase inhibitor-based combination antiretroviral therapy is associated with lower cell-associated HIV RNA and DNA levels compared to protease inhibitor-based therapy
Source: eLife journal article supplement (doi:10.7554/elife.68174), 2021-08-13
Supplement: supp [file elife-68174-supp-v1.zip › elife_poa_e68174_Figure_2_figure_supplement_1.pdf]

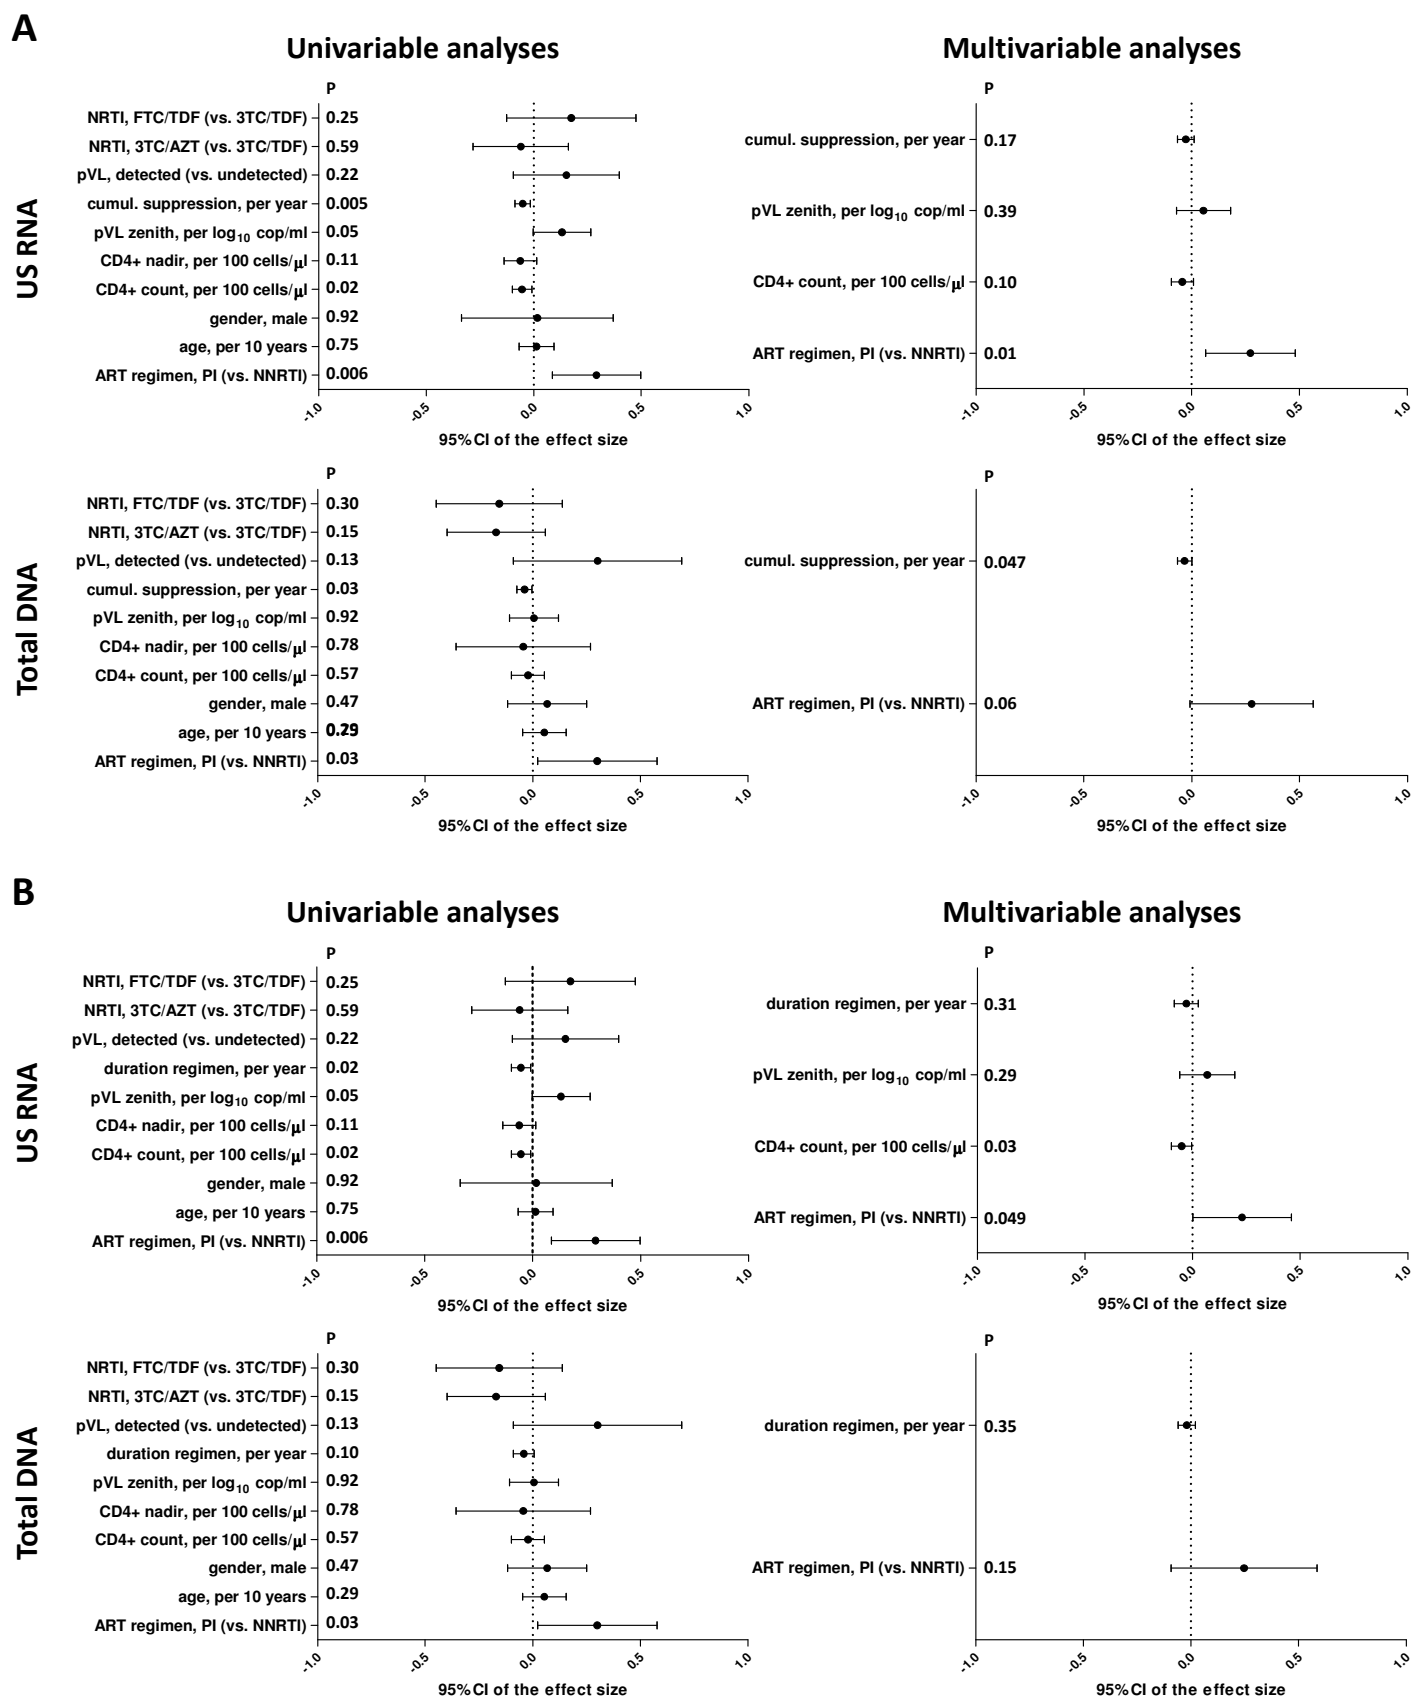

**Figure 2-figure supplement 1.** Regression analyses to identify variables associated with cell-associated HIV unspliced (US) RNA and total HIV DNA levels in the AIMS cohort, taking into account either (A) duration of cumulative virological suppression on ART, or (B) duration of current ART regimen, prior to the measurements. Effect sizes and 95% confidence intervals for US RNA are plotted as log<sub>10</sub> copies per microgram of total cellular RNA and for total DNA as log<sub>10</sub> copies per million PBMC. Effect sizes were obtained by fitting generalized linear models. Variables associated with HIV RNA or DNA with p values <0.1 in the univariable analyses were included in the multivariable analyses.
