# Supplementary material for: Non-nucleoside reverse transcriptase inhibitor-based combination antiretroviral therapy is associated with lower cell-associated HIV RNA and DNA levels compared to protease inhibitor-based therapy
Source: eLife journal article supplement (doi:10.7554/elife.68174), 2021-08-13
Supplement: supp [file elife-68174-supp-v1.zip › elife_poa_e68174_Figure_3_figure_supplement_1.pdf]

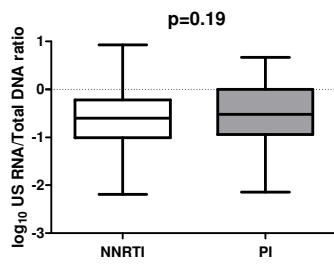

**Figure 3-figure supplement 1.** Association of ART regimen (NNRTI-based vs. PI-based) with the cell-associated HIV unspliced RNA (US RNA) / total HIV DNA ratio in the total pooled cohort (n=213). Level of significance was calculated by Mann-Whitney test.
