# Supplementary material for: Non-nucleoside reverse transcriptase inhibitor-based combination antiretroviral therapy is associated with lower cell-associated HIV RNA and DNA levels compared to protease inhibitor-based therapy
Source: eLife journal article supplement (doi:10.7554/elife.68174), 2021-08-13
Supplement: supp [file elife-68174-supp-v1.zip › elife_poa_e68174_Figure_3_figure_supplement_2.pdf]

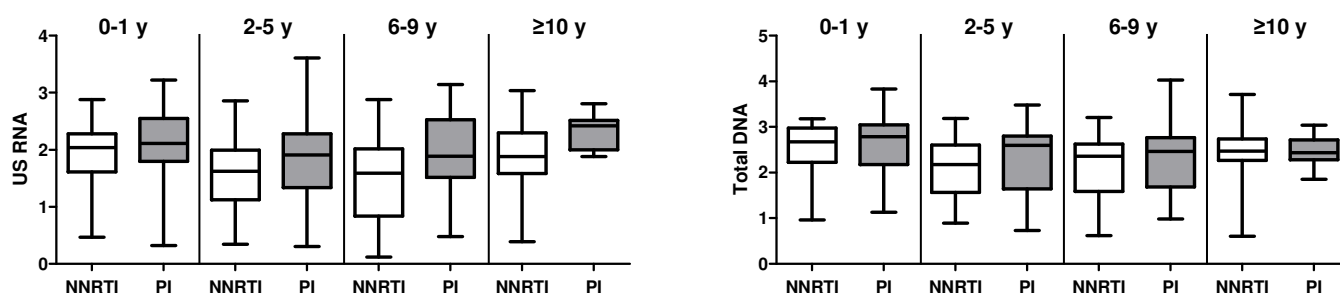

**Figure 3-figure supplement 2.** Associations of ART regimen (NNRTI-based vs. PI-based) with the levels of cell-associated HIV unspliced RNA (US RNA) and total HIV DNA in the total pooled cohort. Participants were grouped according to the time of continuous virological suppression: 0-1 years, 2-5 years, 6-9 years, and 10 years or more. Units of measurement are: US RNA: log<sub>10</sub> copies/μg total RNA, total DNA: log<sub>10</sub> copies/10<sup>6</sup> PBMC.
