# Supplementary material for: Non-nucleoside reverse transcriptase inhibitor-based combination antiretroviral therapy is associated with lower cell-associated HIV RNA and DNA levels compared to protease inhibitor-based therapy
Source: eLife journal article supplement (doi:10.7554/elife.68174), 2021-08-13
Supplement: supp [file elife-68174-supp-v1.zip › elife_poa_e68174_Figure_3_figure_supplement_3.pdf]

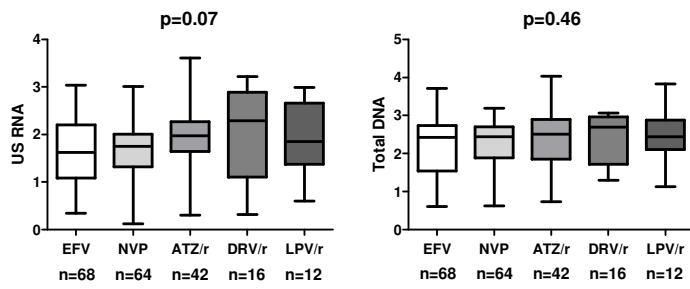

**Figure 3-figure supplement 3.** Levels of US RNA and total HIV DNA in participants treated with ART regimens based on efavirenz (EFV), nevirapine (NVP), ritonavir-boosted atazanavir (ATZ/r), ritonavir-boosted darunavir (DRV/r), or ritonavir-boosted lopinavir (LPV/r) in the total pooled cohort. Units of measurement are: US RNA:  $\log_{10}$  copies/ $\mu$ g total RNA, total DNA:  $\log_{10}$  copies/ $10^6$  PBMC. Levels of significance were calculated by Kruskal-Wallis tests. Participant numbers per regimen are indicated below the graphs.
